# Supplementary material
Source: publisher figshare collection journal article supplement (https://tandf.figshare.com/ndownloader/files/1690036)
Supplement: Supplementary file 1 [file 1690036]

**Online Content**

Table 1: Questions during the meeting

| **Topic** | **Question** |
| --- | --- |
| Quality of life | What is important for your everyday life in the city? How does the city you live in live up to your requirements? What role does moving around in the city play in your everyday life as it is today? |
| Quality of transport | What transport solutions are important to achieve? How can transport be organised in order to create a more liveable city? What do you think about cars as a transport mode? What circumstances do you think could change your life and transport patterns in the future – what does it mean to have kids, finish your education and get a job etc.? |
| Attitudes to different technologies and policy measures | What do you think could be the future consequences for the city you live in, if CO2-lean transport is promoted by: making alternatives more attractive/ banning cars from parts of the city/ promoting intermodal transport solutions? What impact on your everyday life would such initiatives have? What technological solutions do you see as most promising for reducing the CO2 emission from urban transport? What type of measures are you particularly in favour of or opposed to and why? |
| Responsibility | Who is politically responsible for implementing these changes and who should pay for it? How much would you be willing to change your own everyday transport patterns to help make the city you live in cleaner and more suitable for living? |

Figure 1: Factors influencing the mode choice

**
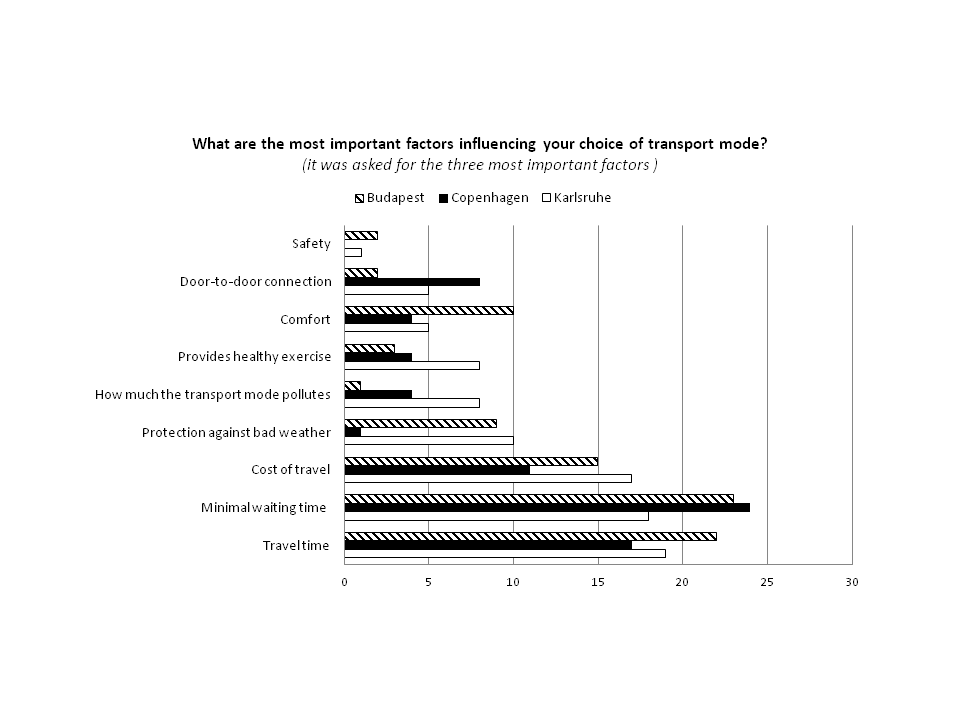
**
